# Supplementary material for: Risk-adjustment models for heart failure patients’ 30-day mortality and readmission rates: the incremental value of clinical data abstracted from medical charts beyond hospital discharge record
Source: Springer Nature journal article supplement (doi:10.1186/s12913-016-1731-9), 2016-09-06
Supplement: MOESM2 [file 10655574]

## List of comorbidities retrieved from the Hospital Discharge Records Database

| Condition                                                   | ICD-9-CM codes                                          |                                                                        |
|-------------------------------------------------------------|---------------------------------------------------------|------------------------------------------------------------------------|
|                                                             | Heart failure episode                                   | Hospital admissions in the previous 2 years                            |
| Malignant tumors                                            | 140.0–208.9, V10                                        | 140.0–208.9, V10                                                       |
| Diabetes*                                                   |                                                         | 250.0–250.9                                                            |
| Disorders of lipid metabolism*                              |                                                         | 272                                                                    |
| Obesity                                                     | 278.0                                                   | 278.0                                                                  |
| Hematologic diseases                                        | 280–285, 288, 289                                       | 280–285, 288, 289                                                      |
| Hypertensive diseases*                                      |                                                         | 401–405                                                                |
| Previous AMI                                                | 412                                                     | 410, 412                                                               |
| Other forms of ischemic heart disease                       |                                                         | 411, 413, 414                                                          |
| Ill-defined descriptions and complications of heart disease |                                                         | 429                                                                    |
| Rheumatic heart disease                                     | 393–398                                                 | 391, 393–398                                                           |
| Cardiomyopathies                                            | 425                                                     | 425                                                                    |
| Other cardiac diseases                                      | 745, V15.1, V42.2, V43.2, V43.3, V45.0                  | 745, V15.1, V42.2, V43.2, V43.3, V45.0                                 |
| Conduction disorders and cardiac dysrhythmias               |                                                         | 426, 427                                                               |
| Cerebrovascular diseases                                    | 433, 437, 438                                           | 430–432, 433, 434, 436, 437, 438                                       |
| Vascular diseases                                           | 440–448 (except 441.1, 441.3, 441.5, 441.6, 444), 557.1 | 440–448, 557                                                           |
| COPD*                                                       |                                                         | 491–492, 494, 496                                                      |
| Chronic nephropathies                                       | 582–583, 585–588                                        | 582–583, 585–588                                                       |
| Chronic diseases of liver, pancreas and intestine           | 571–572, 577.1–577.9, 555, 556                          | 571–572, 577.1–577.9, 555, 556                                         |
| Previous bypass                                             | V45.81                                                  | V45.81, 36.1                                                           |
| Previous PCI                                                | V45.82                                                  | V45.82, 36.0, 00.66                                                    |
| Other surgery of the heart                                  |                                                         | 35, 37.0, 37.1, 37.3, 37.4, 37.5, 37.6, 37.9                           |
| Other surgery of great vessels                              |                                                         | 38–39.5 (except 38.01, 38.02, 38.5, 38.11, 38.12, 38.31, 38.32, 38.93) |
| Previous diagnosis of heart failure                         |                                                         | 428                                                                    |

\*These conditions were not considered at the index episode, because they are not likely to be reported for very severe patients.  
*Abbreviations:* AMI, acute myocardial infarction; COPD, chronic obstructive airway disease; PCI, percutaneous coronary intervention.
